# Supplementary material
Source: Springer Nature journal article supplement (https://www.springermedizin.de/resource/supplementary/12872_2007_186_MOESM4_ESM.pdf/9431276)

Disease prevalence 50%

Minor allele frequency 0.30, type 1 error rate  $10^{-7}$

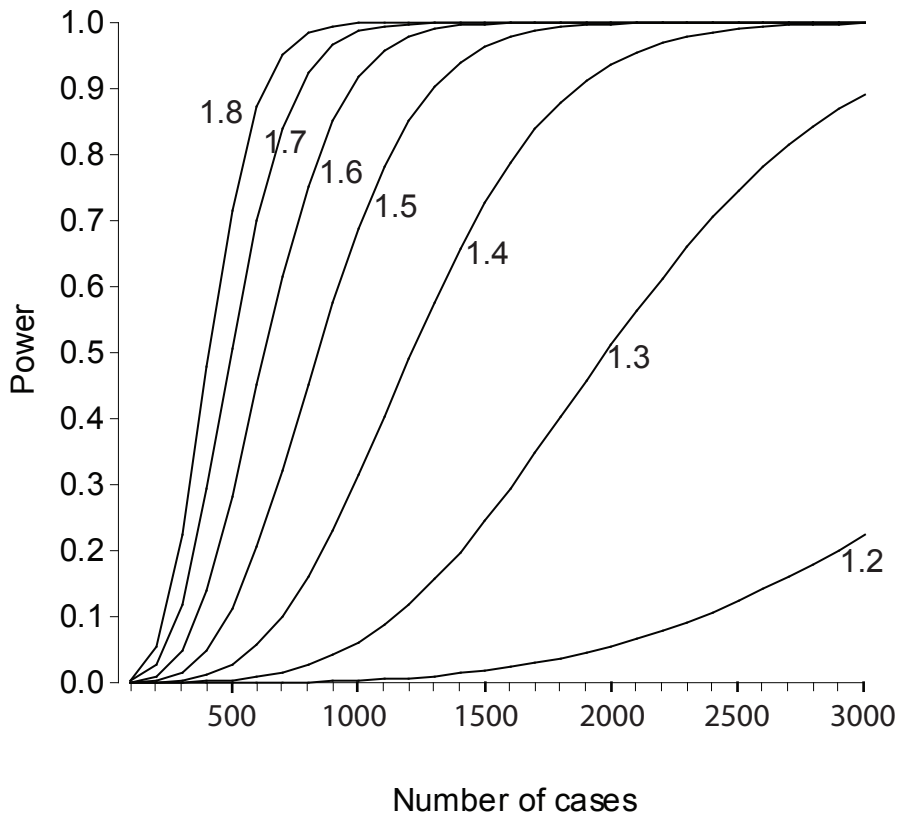

Supplement: MOESM4 [file 9431276]
